# Supplementary material for: A single luminescence center ultra-broadband near-infrared LiScGeO4:Cr phosphor for biological tissue penetration
Source: Royal Society of Chemistry journal article supplement (doi:10.1039/d1dt01244d), 2021-01-01
Supplement: d1dt01244d1.pdf [file d1dt01244d1.pdf]

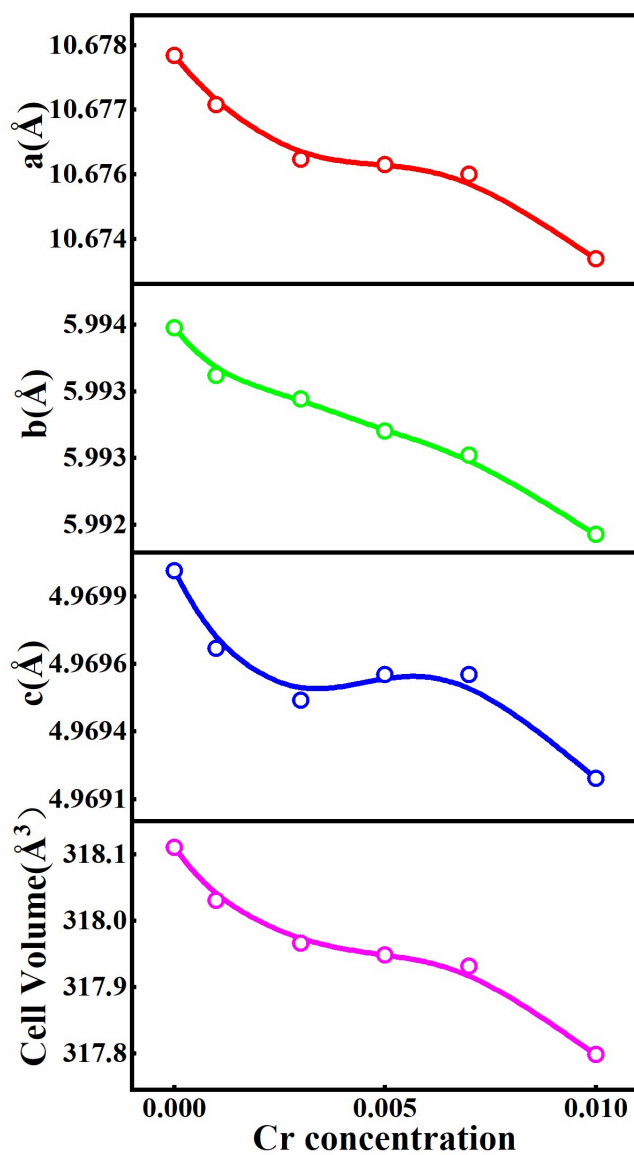

Figure S1. Volume changes of  $\text{LiO}_6$ ,  $\text{ScO}_6$ ,  $\text{GeO}_4$ .

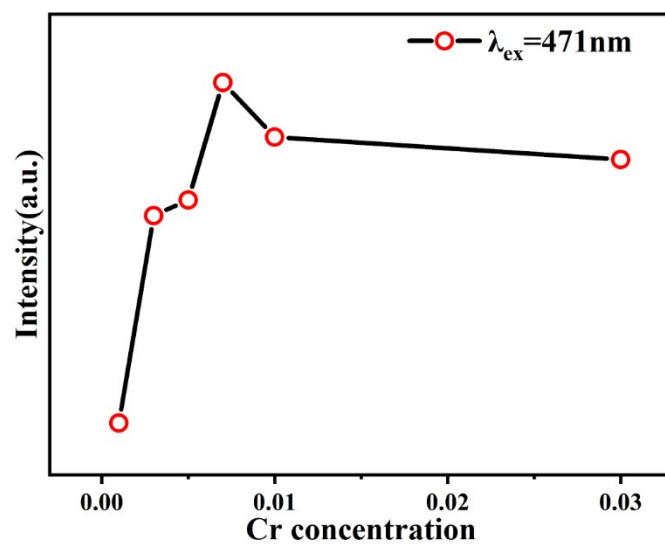

Figure S2. PL maximum intensity of LiScGeO<sub>4</sub>:xCr (x=0.001-0.03).

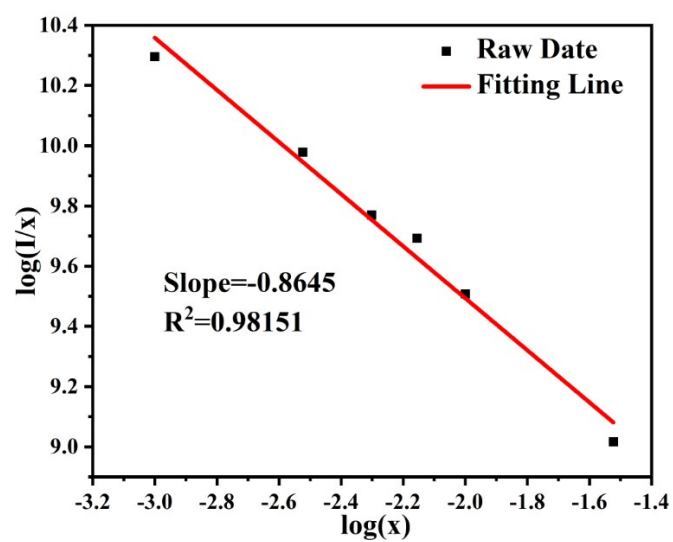

Figure S3. Relationship between  $\log(I/x)$  and  $\log x$ .

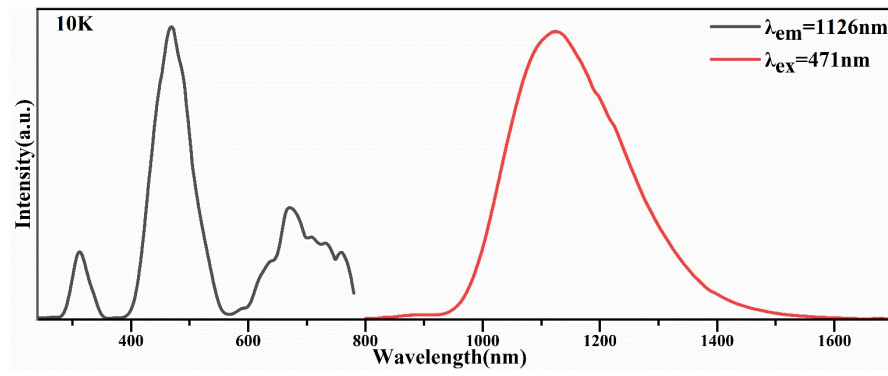

Figure S4. PL and PLE spectra of LiScGeO<sub>4</sub>:0.007Cr at 10K.

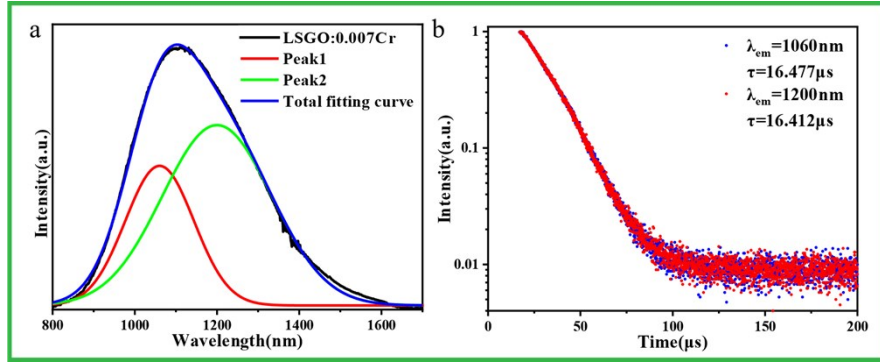

Figure S5. (a) Gaussian fitting of the emission spectrum; (b) Monitoring the decay curves at 1060nm and 1200nm respectively.
